# Supplementary material for: Radiation-induced alternative transcripts as detected in total and polysome-bound mRNA
Source: PubMed Central journal article supplement (PMC5787501; doi:10.18632/oncotarget.21672), 2017-10-09
Supplement: oncotarget-09-691-s001.pdf [file oncotarget-09-691-s001.pdf]

# Radiation-induced alternative transcripts as detected in total and polysome-bound mRNA

## SUPPLEMENTARY MATERIALS

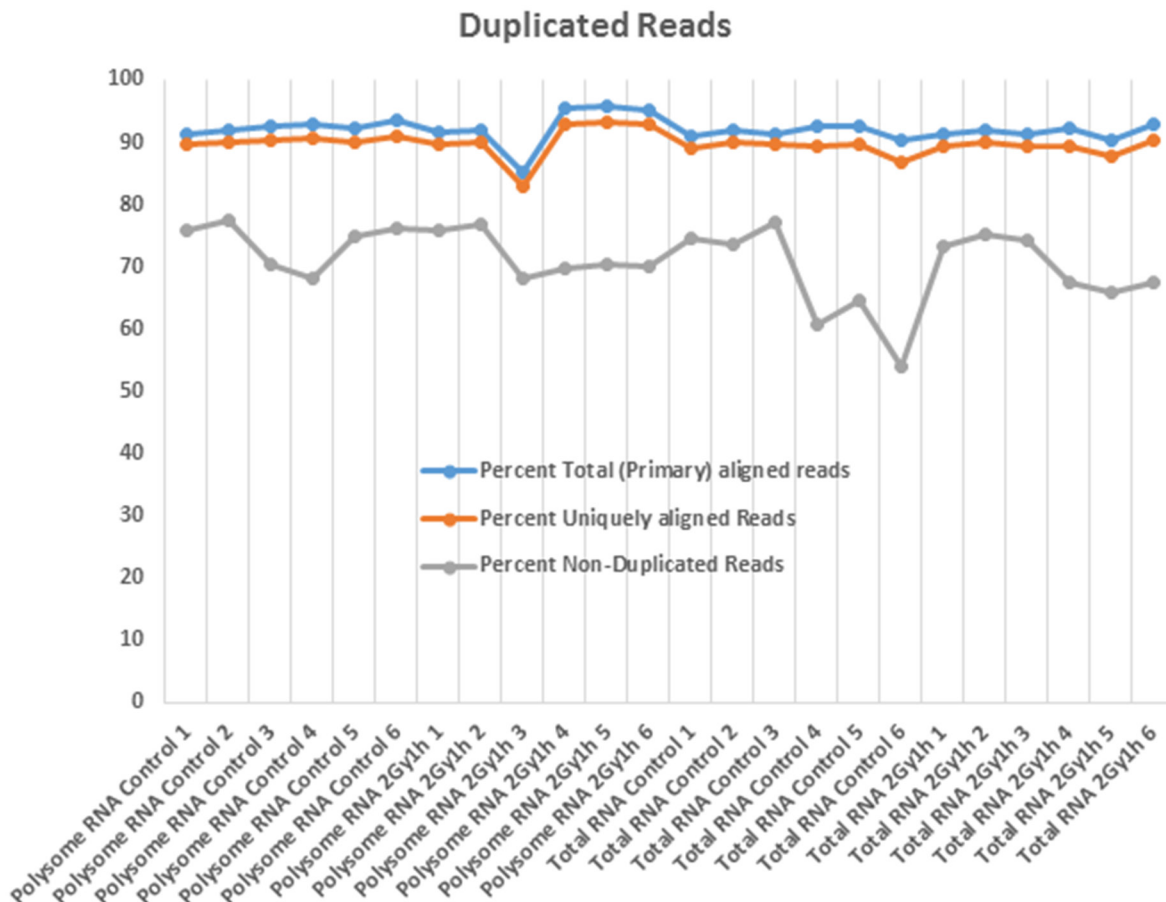

Supplementary Figure 1: Summary of Illumina library complexity.

**Supplementary Table 1: Summary of Illumina RNA-Seq read counts.**

**See Supplementary File 1**

**Supplementary Table 2: Alternative splice events in the untreated transcriptome as compared to transcriptome.**

**See Supplementary File 2**

**Supplementary Table 3: Alternative splice events in the transcriptome after radiation.**

**See Supplementary File 3**

**Supplementary Table 4: Alternative splice events in the transcriptome after radiation.**

**See Supplementary File 4**

**Supplementary Table 5: List of molecules in the top 10 networks in the radiation-induced transcriptome**

|    | Molecules in Network                                                                                                                                                                                                                                                                                                                                                                                                                                         | Top Diseases and Functions                                                                         |
|----|--------------------------------------------------------------------------------------------------------------------------------------------------------------------------------------------------------------------------------------------------------------------------------------------------------------------------------------------------------------------------------------------------------------------------------------------------------------|----------------------------------------------------------------------------------------------------|
| 1  | 14-3-3, Akt, BCR (complex), <b>CMPK2</b> , <b>CNTN1</b> , <b>EGR2</b> , <b>EGR3</b> , GDNF, Hsp90, <b>ID2</b> , IFN type 1, <b>IL17RB</b> , <b>IL22RA1</b> , Immunoglobulin, <b>IRF5</b> , <b>KIT</b> , <b>LHX3</b> , <b>LIF</b> , <b>LUZP1</b> , MAP2K1/2, Notch, <b>NUAK1</b> , p70 S6k, <b>PDGF BB</b> , <b>PDGFD</b> , <b>PIM1</b> , Plk, <b>PLK2</b> , <b>PLK3</b> , PP2A, <b>PRAP1</b> , <b>PRDM1</b> , PRKAA, <b>SNAI1</b> , STAT5a/b                 | Cell Death and Survival, Nervous System Development and Function, Tissue Morphology                |
| 2  | <b>AMER1</b> , <b>ANKRD2</b> , APC (complex), <b>AXIN2</b> , <b>BTG2</b> , <b>CCNE1</b> , <b>Cdc2</b> , <b>CDC6</b> , <b>CDC25A</b> , <b>CDCA7L</b> , Cdk, CDK2-CyclinE, Cyclin A, Cyclin A/Cdk2, Cyclin E, E2f, <b>E2F6</b> , <b>ENC1</b> , ERK1/2, <b>GPC5</b> , <b>HABP2</b> , <b>HAS3</b> , Hedgehog, <b>IL12A</b> , N-cor, <b>NRIP2</b> , <b>ORC1</b> , Rb, <b>ROR2</b> , <b>RRM2</b> , Rxr, Smad2/3-Smad4, thymidine kinase, VitaminD3-VDR-RXR, Wnt    | Cell Cycle, DNA Replication, Recombination, and Repair, Organismal Development                     |
| 3  | 26s Proteasome, Actin, Alp, Alpha catenin, AMPK, <b>ANKS1B</b> , ATPase, caspase, <b>CDK2</b> , <b>CDKN1A</b> , <b>CHD1L</b> , Ck2, cytochrome C, estrogen receptor, <b>FGF17</b> , Hdac, HISTONE, Histone H1, Histone h3, Histone h4, <b>HSPA5</b> , <b>Jnk</b> , <b>JUP</b> , <b>KLF4</b> , <b>PCDH10</b> , <b>PHLDA3</b> , RNA polymerase II, <b>SESN1</b> , <b>SESN2</b> , <b>SYPL2</b> , <b>TAF1L</b> , TCR, <b>TNNT2</b> , <b>TP53INP1</b> , Ubiquitin | Cell Morphology, Organ Morphology, Skeletal and Muscular System Development and Function           |
| 4  | ADCY, <b>ADORA3</b> , ADRB, <b>AMOTL2</b> , <b>ANGPTL7</b> , <b>ARL4C</b> , calpain, <b>CCR1</b> , <b>CD93</b> , <b>CDK5R1</b> , Cg, Creb, <b>EDN2</b> , <b>ERK</b> , Focal adhesion kinase, FSH, <b>GCC1</b> , Gper, <b>GPRC5A</b> , Gsk3, <b>KEL</b> , <b>KIAA1217</b> , Lh, <b>MAFF</b> , Mmp, <b>OSBPL10</b> , p85 (pik3r), Pdgf (complex), Pkc(s), PLC, <b>S1PR3</b> , <b>SRR</b> , STAT, TSH, Vegf                                                     | Cell-To-Cell Signaling and Interaction, Inflammatory Response, Cellular Function and Maintenance   |
| 5  | ACY1, <b>AFG3L2</b> , <b>ANGPTL7</b> , APP, ARPP19, <b>C3orf33</b> , <b>CCDC115</b> , <b>CDS1</b> , CINP, <b>CYB5B</b> , DMKN, FAM214B, FGF16, IL13, L-dopa, L-glutamic acid, <b>MAP3K7CL</b> , NDUFS4, PAIP2, POR, PROK2, <b>RAD51B</b> , <b>RASL11B</b> , <b>RTP4</b> , SCN2B, SCUBE3, <b>SLC25A17</b> , TMCC2, <b>TMEM97</b> , <b>TMEM199</b> , TNR, <b>ULK4</b> , VEGFA, <b>ZBTB34</b> , ZFP36                                                           | Nervous System Development and Function, Cell Death and Survival, Cellular Compromise              |
| 6  | <b>ADORA3</b> , <b>APOL6</b> , <b>BBS4</b> , beta-estradiol, <b>C1RL</b> , <b>CACNA2D1</b> , CACNB1, CACNG8, Collagen(s), cyclic AMP, <b>FECH</b> , GALR1, GALR2, GHRHR, <b>GINS3</b> , <b>GPR84</b> , GPRC5A, <b>GRM6</b> , Hba1/Hba2, HCAR3, hemoglobin, HSD17B, IL1B, PANX1, <b>PDE11A</b> , <b>PDP1</b> , PTGFR, <b>RAD1</b> , RHNO1, SLC14A1, <b>SMOC1</b> , SPPI, SSTR3, TH17 Cytokine, TTC8                                                           | Reproductive System Development and Function, Nucleic Acid Metabolism, Small Molecule Biochemistry |
| 7  | <b>ADNP2</b> , AGT, ATG5, <b>ATG16L2</b> , AUNIP, <b>C17orf82</b> , <b>C1orf198</b> , CAND1, <b>COX15</b> , DCAKD, EED, EFHD2, ELAVL1, <b>FAM50B</b> , FBXO21, GBE1, HCN3, HSP90AA1, ICE2, IGKV1-5, <b>KLHL36</b> , <b>LRIG3</b> , MRPS16, NAA25, <b>NRDE2</b> , Ppp2r5c, PRMT6, RBM5, <b>SLC10A6</b> , <b>SLC17A3</b> , TFIP11, TMEM65, <b>TSPAN6</b> , uric acid, XPO4                                                                                     | Auditory and Vestibular System Development and Function, Embryonic Development, Organ Development  |
| 8  | ADGRE1, APOM, biotin, <b>BZRAP1</b> , Ca <sup>2+</sup> , CACNA1S, CALML3, cholesterol, DAPK2, diacylglycerol, <b>DMC1</b> , <b>FOXN4</b> , <b>GBP5</b> , <b>KCNJ2</b> , LPPR4, LSR, miR-19b-3p (and other miRNAs w/seed GUGCAA), <b>MYLIP</b> , NPC1, NR4A2, <b>PDE1B</b> , phospholipid, PLA2G2D, <b>PPAPDC1B</b> , S100A8, S100A11, <b>SERPINB8</b> , <b>SGMS2</b> , Srebp, <b>STARD5</b> , SYT3, SYT5, tretinoin, VLDLR, <b>ZNF16</b>                     | Cell-To-Cell Signaling and Interaction, Cellular Compromise, Cellular Function and Maintenance     |
| 9  | <b>A1CF</b> , ABHD17A, AEN, ATF2, CAMSAP2, cannabinoil, CDC20B, CYTH4, ESR1, <b>FAM124B</b> , FOS, FXYD6, HNF1A, <b>HPGDS</b> , KCTD9, KRT40, <b>LY6K</b> , MEMO1, MF12, RPS6KA4, SCAND1, <b>SPEF1</b> , <b>SULT4A1</b> , TBCA, TRIM27, UBE21, UBE2T, VSX1, <b>ZKSCAN4</b> , ZNF24, <b>ZNF79</b> , <b>ZNF266</b> , ZNF317, <b>ZSCAN25</b> , ZSCAN32                                                                                                          | Cell Death and Survival, Gene Expression, Cell-To-Cell Signaling and Interaction                   |
| 10 | Ap1, Calcineurin protein(s), CaMKII, <b>CKMT2</b> , <b>ELL2</b> , <b>FASTKD5</b> , Fc gamma receptor, <b>GADD45A</b> , Hsp70, IFN Beta, Iga, Ige, IgG, IgM, IL1, IL12 (complex), IL12 (family), Interferon alpha, LDL, Mek, MHC Class II (complex), <b>MNT</b> , Nfat (family), NFkB (complex), <b>NFKBIA</b> , P38 MAPK, <b>PANX1</b> , PI3K (family), Pro-inflammatory Cytokine, <b>SELPLG</b> , Tgf beta, Tlr, <b>TRIAP1</b> , <b>TRIM13</b>              | Hematological System Development and Function, Hypersensitivity Response, Tissue Morphology        |

Gene names in bold were found to be differentially expressed in the RNA-Seq gene expression analysis.

Supplementary Table 6: List of molecules in the top 10 networks in the radiation-induced translome

|    | Molecules in Network                                                                                                                                                                                                                                                                                     | Top Diseases and Functions                                                                             |
|----|----------------------------------------------------------------------------------------------------------------------------------------------------------------------------------------------------------------------------------------------------------------------------------------------------------|--------------------------------------------------------------------------------------------------------|
| 1  | <b>CGREF1, CIRH1A, CMC1, COA3, COMMD1, COMMD2, COMMD4, COMMD5, COMMD7, COX14, COX4I1, COX6A1, COX6B1, DOHH, GJC1, MRPL46, NFkB (complex), NGFRAP1, NMRAL1, PAM16, PKN3, PNKD, RELT, SLC25A6, SLC2A6, TIMM10, TIMM22, TIMM23, TIMM17B, TIMM8A, TMEM223, TMEM14C, TOMM40, WDR34, ZNF71</b>                 | Developmental Disorder, Hereditary Disorder, Metabolic Disease                                         |
| 2  | <b>ANAPC5, ANAPC11, ANAPC16, ARMC6, BUB3, C20orf24, CCDC24, CDC23, CLPP, COPS3, COPS6, COPS7A, E3 RING, FBXL15, FBXW9, FEM1A, GNG3, GNG10, GPS1, HYAL2, IDH3B, LRR1, Mapk, MRPL41, PDCD2L, PHLDA3, PMF1/PMF1-BGLAP, QTRT1, RBX1, SSR3, TCEB2, TCEB3C (includes others), TMEM11, WRAP73, ZC3HC1</b>       | Auditory Disease, Developmental Disorder, Endocrine System Disorders                                   |
| 3  | <b>AP5B1, AP5S1, ASF1B, C19orf25, C8orf48, CARD9, CBX2, CCDC71, CCDC85B, CDCA4, chemokine, chemokine receptor, E2F2, ENKD1, FASTK, H3F3A/H3F3B, HIST1H2AB, HIST1H3C, HIST1H3F, IFRD2, KIF9, MCM2, MCM5, MCM7, MLF2, MPDU1, MRPS7, NUP85, ORC6, PDLIM7, PMVK, PSMD2, SLC1A5, TSSC1, ZFAND2A</b>           | Cellular Assembly and Organization, DNA Replication, Recombination, and Repair, Developmental Disorder |
| 4  | <b>ACAP3, ASNA1, BCL2L12, C19orf60, CAK, CCNO, Cdk, CDK2-CyclinE, CDKN1A, CLEC3B, CPSF3L, DALRD3, EIF6, FH, FLAD1, GET4, HAUS4, HAUS5, HAUS7, HAUS8, KLF16, MRPL37, MYDGF, NEK8, NOC2L, PCBP4, PHKG2, RNF126, SEC61B, SGTA, TALDO1, TCTEX1D2, TK1, WDR18, WDR73</b>                                      | Cellular Assembly and Organization, Cellular Function and Maintenance, Cell Cycle                      |
| 5  | <b>ABT1, ACD, ALG12, BANF1, BSCL2, BYSL, CAPZB, DDX41, EEF1D, EIF5A, EMD, G protein alpha, GDPD5, GTPBP8, HDL-cholesterol, HSPBP1, KCNQ2, LIMD2, MRPL20, MRPL53, MVK, NEIL2, NHEJ1, NHLRC1, PNKP, PUF60, SARS2, SIAH1, SIRT6, SMO, SOX18, STUB1, tubulin (complex), UXT, XRCC6</b>                       | Cell Cycle, DNA Replication, Recombination, and Repair, Reproductive System Development and Function   |
| 6  | <b>BOP1, CD320, CDCA5, Cyclin D1/cdk4, EGFL7, ERK, FAU, FRS3, ILVBL, LOXL1, MAFF, RER1, Ribosomal 40s subunit, Rnr, RPAIN, RPS2, RPS3, RPS5, RPS8, RPS10, RPS12, RPS14, RPS15, RPS16, RPS19, RPS21, RPS26, RPS28, RPS29, SIPA1, THEMIS2, TSR2, TXNL4B, UBL4A, UMPS</b>                                   | Cardiovascular Disease, Developmental Disorder, Hematological Disease                                  |
| 7  | <b>AIMP2, APRT, BLOC1S4, C9orf116, Caveolin, DDX28, DDX49, DNP1, DTNBP1, EIF3K, FHL3, FTSJ1, FTSJ2, GALNT15, Integrin alpha 5 beta 1, methyltransferase, MIS18A, MRPL12, MRPL27, MRPL38, MYCBP, NAPA, NOL12, OIP5, Pka, PRMT1, RAB32, RALY, RNMTL1, SLC25A10, SNAPIN, SPSB2, TRMT112, TYMSOS, WBSR22</b> | Cellular Function and Maintenance, Nervous System Development and Function, Cell Death and Survival    |
| 8  | <b>APC/APC2, BCL2L13, C19orf70, CARHSP1, CDK10, CK1, CLN3, CMTM6, CRELD2, CYC1, ELOVL1, FAM64A, FKBP1A, FKBP1B, Gsk3, HINT2, MOCS1, MRPL14, peptidylprolyl isomerase, PIN1, PPIE, PPIF, PREB, SFXN4, SLC25A4, SLC25A11, SLC25A19, SSBP4, TECR, TELO2, TIMM13, TIMM50, TMEM128, TOMM22, TSPO</b>          | Post-Translational Modification, Protein Folding, Lipid Metabolism                                     |
| 9  | <b>ACTL6A, ACTR5, APOA1BP, ASL, CDK20, cyclooxygenase, EPDR1, GSS, H2AFX, H2AFZ, HMOX1, HSD11B2, INO80C, INO80E, MAT2A, MCRS1, MYL6B, NTPCR, Nuclear factor 1, PITX3, POFUT1, POLR2E, POMC, PROCR, RRP9, RUVBL2, SLC25A5, SNU13, Stat3-Stat3, TFPT, TIP60, WDR61, WRAP53, ZNHIT1, ZNHIT2</b>             | Drug Metabolism, Endocrine System Development and Function, Lipid Metabolism                           |
| 10 | <b>adenosine-tetraphosphatase, ATP synthase, ATP5B, ATP5D, ATP5G1, ATP5G3, ATP5S, CDK2AP2, DERL2, DPM2, DTYMK, EBP, EBPL, ECSIT, F0 ATP synthase, FOXRED1, GCDH, HSD17B7, JAGN1, LAMTOR4, MCOLN1, MSRB1, MT1X, NID2, PEMT, PEX16, PIGH, PKDCC, PPA2, PYCR1, SLC25A1, VDACC2, Vegf, VKORC1, YIF1A</b>     | Energy Production, Nucleic Acid Metabolism, Small Molecule Biochemistry                                |

Gene names in bold were found to be differentially expressed in the RNA-Seq gene expression analysis.

**Supplementary Table 7: TaqMan gene expression assays**

|        | <b>TaqMan Assay ID</b> |
|--------|------------------------|
| UBE2G2 | Hs01119563_m1          |
| TGFBR2 | Hs00947875_m1          |
| STRN3  | Hs00923644_m1          |
| eIF4H  | Hs01091758_g1          |
| NDE11  | Hs00229366_m1          |
| SOS1   | Hs00893135_m1          |
| 18S    | Hs99999901_s1          |
